# Supplementary material
Source: PubMed Central journal article supplement (PMC3034281)
Supplement: NIHMS265405-supplement-Supplementary_Table_1.pdf [file NIHMS265405-supplement-Supplementary_Table_1.pdf]

**Supplementary Table 1: Estimated probability of childhood-onset SLE predicted by the number of risk alleles present.**

| RACE              | # Risk Alleles | Predicted Probability | 95% CI  |         |
|-------------------|----------------|-----------------------|---------|---------|
|                   |                |                       | lower   | upper   |
| African American  | 7              | 0.01317               | 0.00284 | 0.05877 |
| African American  | 8              | 0.01645               | 0.00431 | 0.06067 |
| African American  | 9              | 0.02054               | 0.00651 | 0.0629  |
| African American  | 10             | 0.02562               | 0.00973 | 0.06568 |
| African American  | 11             | 0.03191               | 0.01436 | 0.0694  |
| African American  | 12             | 0.03968               | 0.02067 | 0.07483 |
| African American  | 13             | 0.04925               | 0.02856 | 0.08364 |
| African American  | 14             | 0.06098               | 0.03699 | 0.09894 |
| African American  | 15             | 0.07529               | 0.04434 | 0.12501 |
| African American  | 16             | 0.09262               | 0.04989 | 0.16557 |
| African American  | 17             | 0.11345               | 0.05396 | 0.22304 |
| African American  | 18             | 0.13825               | 0.0571  | 0.29824 |
| African American  | 19             | 0.16745               | 0.05967 | 0.38929 |
| African American  | 21             | 0.24019               | 0.06389 | 0.59417 |
| European American | 6              | 0.0766                | 0.0224  | 0.23093 |
| European American | 8              | 0.07339               | 0.02822 | 0.17765 |
| European American | 9              | 0.07183               | 0.03148 | 0.15559 |
| European American | 10             | 0.0703                | 0.03489 | 0.13658 |
| European American | 11             | 0.06881               | 0.03826 | 0.12068 |
| European American | 12             | 0.06734               | 0.04122 | 0.10813 |
| European American | 13             | 0.0659                | 0.04315 | 0.09941 |
| European American | 14             | 0.06449               | 0.04322 | 0.09518 |
| European American | 15             | 0.06311               | 0.04114 | 0.09563 |
| European American | 16             | 0.06175               | 0.03751 | 0.10003 |
| European American | 17             | 0.06043               | 0.03323 | 0.1074  |
| European American | 18             | 0.05913               | 0.02894 | 0.11701 |
| European American | 19             | 0.05785               | 0.02493 | 0.12851 |
| European American | 20             | 0.0566                | 0.02134 | 0.14172 |
| European American | 21             | 0.05538               | 0.01818 | 0.15658 |
| European American | 22             | 0.05418               | 0.01544 | 0.17308 |
| Gullah            | 6              | 0.00453               | 0.00026 | 0.07264 |
| Gullah            | 7              | 0.00668               | 0.00053 | 0.07817 |
| Gullah            | 8              | 0.00982               | 0.00107 | 0.08438 |
| Gullah            | 9              | 0.01443               | 0.00212 | 0.09149 |
| Gullah            | 10             | 0.02115               | 0.00419 | 0.09989 |
| Gullah            | 11             | 0.0309                | 0.00813 | 0.11035 |
| Gullah            | 12             | 0.04495               | 0.01535 | 0.12442 |
| Gullah            | 13             | 0.06494               | 0.02753 | 0.14561 |
| Gullah            | 14             | 0.09297               | 0.04514 | 0.18183 |
| Gullah            | 15             | 0.1314                | 0.06516 | 0.24717 |
| Gullah            | 16             | 0.1825                | 0.08319 | 0.35454 |

|          |    |         |         |         |
|----------|----|---------|---------|---------|
| Gullah   | 17 | 0.24782 | 0.09806 | 0.4996  |
| Gullah   | 18 | 0.32715 | 0.11071 | 0.65506 |
| Gullah   | 19 | 0.41778 | 0.12211 | 0.78731 |
| Gullah   | 20 | 0.51432 | 0.1329  | 0.87976 |
| Hispanic | 7  | 0.03459 | 0.00541 | 0.19096 |
| Hispanic | 8  | 0.04167 | 0.00802 | 0.18953 |
| Hispanic | 10 | 0.0602  | 0.01739 | 0.18818 |
| Hispanic | 11 | 0.07214 | 0.02532 | 0.18878 |
| Hispanic | 12 | 0.08622 | 0.03635 | 0.19096 |
| Hispanic | 13 | 0.10276 | 0.05108 | 0.19592 |
| Hispanic | 14 | 0.12204 | 0.06928 | 0.20607 |
| Hispanic | 15 | 0.14435 | 0.08883 | 0.22597 |
| Hispanic | 16 | 0.16996 | 0.10569 | 0.26186 |
| Hispanic | 17 | 0.19905 | 0.11711 | 0.31768 |
| Hispanic | 18 | 0.23173 | 0.12367 | 0.39197 |
| Hispanic | 19 | 0.26798 | 0.12708 | 0.47932 |
| Hispanic | 20 | 0.30763 | 0.12862 | 0.57219 |
| Hispanic | 21 | 0.35034 | 0.12904 | 0.6625  |

---
