# Supplementary material
Source: PubMed Central journal article supplement (PMC3034281)
Supplement: NIHMS265405-supplement-Supplementary_Table_2.pdf [file NIHMS265405-supplement-Supplementary_Table_2.pdf]

**Supplementary Table 2: Estimated number of SLE risk alleles present as predicted by the age of disease onset.**

| RACE             | Age of Onset | Predicted # Risk Alleles | 95% CI |       |
|------------------|--------------|--------------------------|--------|-------|
|                  |              |                          | lower  | upper |
| African American | 6            | 13.74                    | 8.69   | 18.78 |
| African American | 7            | 13.70                    | 8.66   | 18.74 |
| African American | 8            | 13.67                    | 8.63   | 18.71 |
| African American | 12           | 13.54                    | 8.52   | 18.56 |
| African American | 13           | 13.51                    | 8.49   | 18.53 |
| African American | 15           | 13.44                    | 8.43   | 18.46 |
| African American | 16           | 13.41                    | 8.40   | 18.42 |
| African American | 17           | 13.38                    | 8.37   | 18.39 |
| African American | 19           | 13.31                    | 8.31   | 18.32 |
| African American | 20           | 13.28                    | 8.28   | 18.28 |
| African American | 21           | 13.25                    | 8.25   | 18.25 |
| African American | 22           | 13.21                    | 8.21   | 18.21 |
| African American | 23           | 13.18                    | 8.18   | 18.18 |
| African American | 24           | 13.15                    | 8.15   | 18.15 |
| African American | 25           | 13.12                    | 8.12   | 18.11 |
| African American | 26           | 13.08                    | 8.09   | 18.08 |
| African American | 27           | 13.05                    | 8.06   | 18.04 |
| African American | 28           | 13.02                    | 8.03   | 18.01 |
| African American | 29           | 12.99                    | 8.00   | 17.98 |
| African American | 30           | 12.95                    | 7.96   | 17.94 |
| African American | 31           | 12.92                    | 7.93   | 17.91 |
| African American | 32           | 12.89                    | 7.90   | 17.88 |
| African American | 33           | 12.86                    | 7.87   | 17.84 |
| African American | 34           | 12.82                    | 7.84   | 17.81 |
| African American | 35           | 12.79                    | 7.80   | 17.78 |
| African American | 36           | 12.76                    | 7.77   | 17.75 |
| African American | 37           | 12.73                    | 7.74   | 17.71 |
| African American | 38           | 12.69                    | 7.71   | 17.68 |
| African American | 39           | 12.66                    | 7.67   | 17.65 |
| African American | 40           | 12.63                    | 7.64   | 17.62 |
| African American | 41           | 12.60                    | 7.61   | 17.58 |
| African American | 42           | 12.56                    | 7.58   | 17.55 |
| African American | 43           | 12.53                    | 7.54   | 17.52 |
| African American | 44           | 12.50                    | 7.51   | 17.49 |
| African American | 45           | 12.47                    | 7.48   | 17.46 |
| African American | 46           | 12.43                    | 7.44   | 17.43 |
| African American | 47           | 12.40                    | 7.41   | 17.39 |
| African American | 48           | 12.37                    | 7.37   | 17.36 |
| African American | 49           | 12.34                    | 7.34   | 17.33 |
| African American | 50           | 12.30                    | 7.31   | 17.30 |
| African American | 51           | 12.27                    | 7.27   | 17.27 |
| African American | 52           | 12.24                    | 7.24   | 17.24 |
| African American | 53           | 12.21                    | 7.20   | 17.21 |

|                   |    |       |      |       |
|-------------------|----|-------|------|-------|
| African American  | 54 | 12.17 | 7.17 | 17.18 |
| African American  | 55 | 12.14 | 7.13 | 17.15 |
| African American  | 56 | 12.11 | 7.10 | 17.12 |
| African American  | 57 | 12.08 | 7.06 | 17.09 |
| African American  | 59 | 12.01 | 6.99 | 17.03 |
| African American  | 61 | 11.95 | 6.92 | 16.97 |
| African American  | 62 | 11.91 | 6.89 | 16.94 |
| African American  | 63 | 11.88 | 6.85 | 16.91 |
| African American  | 64 | 11.85 | 6.81 | 16.88 |
| African American  | 65 | 11.82 | 6.78 | 16.85 |
| African American  | 66 | 11.78 | 6.74 | 16.82 |
| African American  | 68 | 11.72 | 6.67 | 16.76 |
| European American | 5  | 14.50 | 8.97 | 20.02 |
| European American | 10 | 14.44 | 8.92 | 19.95 |
| European American | 11 | 14.42 | 8.91 | 19.93 |
| European American | 12 | 14.41 | 8.90 | 19.92 |
| European American | 13 | 14.40 | 8.89 | 19.91 |
| European American | 14 | 14.39 | 8.89 | 19.89 |
| European American | 15 | 14.38 | 8.88 | 19.88 |
| European American | 16 | 14.36 | 8.87 | 19.86 |
| European American | 17 | 14.35 | 8.86 | 19.85 |
| European American | 18 | 14.34 | 8.84 | 19.84 |
| European American | 19 | 14.33 | 8.83 | 19.82 |
| European American | 20 | 14.32 | 8.82 | 19.81 |
| European American | 21 | 14.31 | 8.81 | 19.80 |
| European American | 22 | 14.29 | 8.80 | 19.78 |
| European American | 23 | 14.28 | 8.79 | 19.77 |
| European American | 24 | 14.27 | 8.78 | 19.76 |
| European American | 25 | 14.26 | 8.77 | 19.74 |
| European American | 26 | 14.25 | 8.76 | 19.73 |
| European American | 27 | 14.23 | 8.75 | 19.72 |
| European American | 28 | 14.22 | 8.74 | 19.71 |
| European American | 29 | 14.21 | 8.73 | 19.69 |
| European American | 30 | 14.20 | 8.72 | 19.68 |
| European American | 31 | 14.19 | 8.70 | 19.67 |
| European American | 32 | 14.18 | 8.69 | 19.66 |
| European American | 33 | 14.16 | 8.68 | 19.65 |
| European American | 34 | 14.15 | 8.67 | 19.63 |
| European American | 35 | 14.14 | 8.66 | 19.62 |
| European American | 36 | 14.13 | 8.65 | 19.61 |
| European American | 37 | 14.12 | 8.63 | 19.60 |
| European American | 38 | 14.10 | 8.62 | 19.59 |
| European American | 39 | 14.09 | 8.61 | 19.57 |
| European American | 40 | 14.08 | 8.60 | 19.56 |
| European American | 41 | 14.07 | 8.59 | 19.55 |
| European American | 42 | 14.06 | 8.57 | 19.54 |
| European American | 43 | 14.04 | 8.56 | 19.53 |

|                   |    |       |      |       |
|-------------------|----|-------|------|-------|
| European American | 44 | 14.03 | 8.55 | 19.52 |
| European American | 45 | 14.02 | 8.54 | 19.51 |
| European American | 46 | 14.01 | 8.52 | 19.49 |
| European American | 47 | 14.00 | 8.51 | 19.48 |
| European American | 48 | 13.99 | 8.50 | 19.47 |
| European American | 49 | 13.97 | 8.49 | 19.46 |
| European American | 50 | 13.96 | 8.47 | 19.45 |
| European American | 51 | 13.95 | 8.46 | 19.44 |
| European American | 52 | 13.94 | 8.45 | 19.43 |
| European American | 53 | 13.93 | 8.43 | 19.42 |
| European American | 54 | 13.91 | 8.42 | 19.41 |
| European American | 55 | 13.90 | 8.41 | 19.40 |
| European American | 56 | 13.89 | 8.39 | 19.39 |
| European American | 57 | 13.88 | 8.38 | 19.38 |
| European American | 59 | 13.86 | 8.35 | 19.36 |
| European American | 60 | 13.84 | 8.34 | 19.35 |
| European American | 62 | 13.82 | 8.31 | 19.33 |
| European American | 63 | 13.81 | 8.30 | 19.32 |
| European American | 64 | 13.80 | 8.28 | 19.31 |
| European American | 65 | 13.78 | 8.27 | 19.30 |
| European American | 66 | 13.77 | 8.25 | 19.29 |
| European American | 67 | 13.76 | 8.24 | 19.28 |
| European American | 70 | 13.72 | 8.19 | 19.26 |
| European American | 72 | 13.70 | 8.16 | 19.24 |
| European American | 75 | 13.67 | 8.12 | 19.21 |
| Gullah            | 6  | 14.38 | 9.70 | 19.06 |
| Gullah            | 7  | 14.32 | 9.65 | 19.00 |
| Gullah            | 11 | 14.10 | 9.46 | 18.75 |
| Gullah            | 13 | 13.99 | 9.36 | 18.62 |
| Gullah            | 15 | 13.88 | 9.26 | 18.50 |
| Gullah            | 16 | 13.82 | 9.21 | 18.44 |
| Gullah            | 17 | 13.77 | 9.16 | 18.38 |
| Gullah            | 18 | 13.71 | 9.11 | 18.32 |
| Gullah            | 19 | 13.66 | 9.06 | 18.26 |
| Gullah            | 20 | 13.60 | 9.01 | 18.20 |
| Gullah            | 21 | 13.55 | 8.95 | 18.14 |
| Gullah            | 22 | 13.49 | 8.90 | 18.08 |
| Gullah            | 23 | 13.44 | 8.85 | 18.02 |
| Gullah            | 24 | 13.38 | 8.80 | 17.96 |
| Gullah            | 27 | 13.22 | 8.64 | 17.79 |
| Gullah            | 28 | 13.16 | 8.58 | 17.73 |
| Gullah            | 29 | 13.10 | 8.53 | 17.68 |
| Gullah            | 30 | 13.05 | 8.48 | 17.62 |
| Gullah            | 31 | 12.99 | 8.42 | 17.57 |
| Gullah            | 32 | 12.94 | 8.37 | 17.51 |
| Gullah            | 33 | 12.88 | 8.31 | 17.45 |
| Gullah            | 34 | 12.83 | 8.26 | 17.40 |

|          |    |       |       |       |
|----------|----|-------|-------|-------|
| Gullah   | 35 | 12.77 | 8.20  | 17.34 |
| Gullah   | 36 | 12.72 | 8.14  | 17.29 |
| Gullah   | 37 | 12.66 | 8.09  | 17.24 |
| Gullah   | 38 | 12.61 | 8.03  | 17.18 |
| Gullah   | 39 | 12.55 | 7.97  | 17.13 |
| Gullah   | 40 | 12.50 | 7.92  | 17.07 |
| Gullah   | 41 | 12.44 | 7.86  | 17.02 |
| Gullah   | 42 | 12.38 | 7.80  | 16.97 |
| Gullah   | 43 | 12.33 | 7.74  | 16.92 |
| Gullah   | 44 | 12.27 | 7.68  | 16.86 |
| Gullah   | 45 | 12.22 | 7.62  | 16.81 |
| Gullah   | 46 | 12.16 | 7.57  | 16.76 |
| Gullah   | 47 | 12.11 | 7.51  | 16.71 |
| Gullah   | 48 | 12.05 | 7.45  | 16.66 |
| Gullah   | 49 | 12.00 | 7.39  | 16.61 |
| Gullah   | 50 | 11.94 | 7.32  | 16.56 |
| Gullah   | 52 | 11.83 | 7.20  | 16.46 |
| Gullah   | 53 | 11.78 | 7.14  | 16.41 |
| Gullah   | 55 | 11.67 | 7.02  | 16.31 |
| Gullah   | 57 | 11.55 | 6.89  | 16.22 |
| Gullah   | 60 | 11.39 | 6.70  | 16.07 |
| Gullah   | 62 | 11.28 | 6.58  | 15.98 |
| Hispanic | 7  | 15.52 | 10.21 | 20.83 |
| Hispanic | 8  | 15.48 | 10.18 | 20.78 |
| Hispanic | 9  | 15.44 | 10.14 | 20.73 |
| Hispanic | 10 | 15.40 | 10.11 | 20.69 |
| Hispanic | 11 | 15.36 | 10.08 | 20.64 |
| Hispanic | 13 | 15.28 | 10.01 | 20.55 |
| Hispanic | 14 | 15.24 | 9.98  | 20.51 |
| Hispanic | 15 | 15.20 | 9.94  | 20.46 |
| Hispanic | 16 | 15.16 | 9.91  | 20.42 |
| Hispanic | 17 | 15.12 | 9.88  | 20.37 |
| Hispanic | 19 | 15.05 | 9.81  | 20.29 |
| Hispanic | 20 | 15.01 | 9.77  | 20.24 |
| Hispanic | 21 | 14.97 | 9.73  | 20.20 |
| Hispanic | 22 | 14.93 | 9.70  | 20.16 |
| Hispanic | 23 | 14.89 | 9.66  | 20.12 |
| Hispanic | 24 | 14.85 | 9.62  | 20.08 |
| Hispanic | 25 | 14.81 | 9.59  | 20.03 |
| Hispanic | 26 | 14.77 | 9.55  | 19.99 |
| Hispanic | 27 | 14.73 | 9.51  | 19.95 |
| Hispanic | 28 | 14.69 | 9.47  | 19.91 |
| Hispanic | 29 | 14.65 | 9.43  | 19.87 |
| Hispanic | 30 | 14.61 | 9.40  | 19.83 |
| Hispanic | 31 | 14.57 | 9.36  | 19.79 |
| Hispanic | 32 | 14.54 | 9.32  | 19.75 |
| Hispanic | 33 | 14.50 | 9.28  | 19.72 |

|          |    |       |      |       |
|----------|----|-------|------|-------|
| Hispanic | 35 | 14.42 | 9.20 | 19.64 |
| Hispanic | 36 | 14.38 | 9.16 | 19.60 |
| Hispanic | 37 | 14.34 | 9.11 | 19.56 |
| Hispanic | 38 | 14.30 | 9.07 | 19.53 |
| Hispanic | 39 | 14.26 | 9.03 | 19.49 |
| Hispanic | 40 | 14.22 | 8.99 | 19.45 |
| Hispanic | 41 | 14.18 | 8.95 | 19.42 |
| Hispanic | 42 | 14.14 | 8.90 | 19.38 |
| Hispanic | 43 | 14.10 | 8.86 | 19.35 |
| Hispanic | 44 | 14.06 | 8.82 | 19.31 |
| Hispanic | 45 | 14.03 | 8.77 | 19.28 |
| Hispanic | 46 | 13.99 | 8.73 | 19.24 |
| Hispanic | 47 | 13.95 | 8.69 | 19.21 |
| Hispanic | 49 | 13.87 | 8.60 | 19.14 |
| Hispanic | 50 | 13.83 | 8.55 | 19.11 |
| Hispanic | 52 | 13.75 | 8.46 | 19.04 |
| Hispanic | 53 | 13.71 | 8.41 | 19.01 |
| Hispanic | 56 | 13.59 | 8.27 | 18.91 |
| Hispanic | 57 | 13.55 | 8.23 | 18.88 |
| Hispanic | 59 | 13.48 | 8.13 | 18.82 |
| Hispanic | 60 | 13.44 | 8.08 | 18.79 |

---
